# Supplementary material for: Health education interventions across Thailand, the Philippines, and Japan: A multisite comparison in varying socio-environmental and policy contexts
Source: Research Square preprint supplement (doi:10.21203/rs.3.rs-7027881/v1), 2025-07-23
Supplement: Supplementary file 1 [file 4725fecf0f1192b5b9d9abe8.docx]

**Table 4 Comparison of measurements before and after health education in the four regions**

|  | **T/b** | **T/a** | **p** | **P/b** | **P/a** | **p** | **A/b** | **A/a** | **p** | **I/b** | **I/a** | **p** | **Two-way ANONA** | **Tukey-Kramer** | | | | |
| --- | --- | --- | --- | --- | --- | --- | --- | --- | --- | --- | --- | --- | --- | --- | --- | --- | --- | --- |
| **T-b/a** | **P-b/a** | **A-b/a** | **I-b/a** | |
| **Anthropometric** | | | | | | | | | | | | | | | | | |
| Weight | 59.1±2.6 | 62.0±3.3 | 0.063 | 74.0±2.0 | 72.0±2.0 | 0.047* | 57.0±1.2 | 56.6±1.6 | 0.659 | 58.5±1.4 | 55.0±1.4 | 0.001*** | 0.001*** |  |  |  |  | |
| BMI | 21.9±0.9 | 22.9±1.1 | 0.049* | 27.2±0.7 | 26.8±0.7 | 0.050 | 23.1±0.4 | 23.0±0.5 | 0.554 | 23.9±0.5 | 22.4±0.4 | 0.001*** | 0.401 |  |  |  |  | |
| Abdominal | 81.2±3.0 | 85.4±1.6 | 0.262 | 91.5±1.7 | 90.0±1.7 | 0.044* | 85.0±1.2 | 83.5±1.5 | 0.003** | 86.4±1.3 | 81.4±1.1 | 0.001*** | 0.001*** |  |  |  |  | |
|  |  |  |  |  |  |  |  |  |  |  |  |  |  |  |  |  |  | |
| **Blood Pressure** | | | | | | | | | | | | | | | | | |
| Systolic | 124.4±2.2 | 127.7±2.6 | 0.445 | 115.9±2.4 | 120.7±2.0 | 0.025* | 122.7±2.2 | 131.5±2.1 | 0.002** | 126.3±2.2 | 127.7±2.1 | 0.471 | 0.001*** |  |  |  |  | |
| Diastolic | 79.3±2.5 | 78.3±1.5 | 0.634 | 80.5±1.5 | 80.3±1.9 | 0.103 | 70.9±1.3 | 77.2±1.5 | 0.001** | 77.2±1.3 | 77.2±1.3 | 0.958 | 0.001*** |  |  | 0.05* |  | |
|  |  |  |  |  |  |  |  |  |  |  |  |  |  |  |  |  |  | |
| **Physical fitness** | | | | | | | | | | | | | | | | | |
| Grip strength | 35.2±2.2 | 33.7±2.4 | 0.450 | 32.1±1.0 | 33.3±1.2 | 0.097 | 26.0±0.9 | 26.4±1.0 | 0.231 | 32.3±1.2 | 32.5±1.3 | 0.563 | 0.889 |  |  |  |  | |
| Sit-ups | 13.5±1.4 | 17.0±2.7 | 0.155 | 14.7±1.2 | 13.7±1.0 | 0.335 | 10.8±1.0 | 12.1±1.0 | 0.614 | 11.9±0.8 | 16.3±1.1 | 0.001*** | 0.001*** |  |  |  |  | |
| Sit-and reach | 37.2±1.7 | 36.6±2.2 | 0.714 | 30.3±1.8 | 27.9±1.5 | 0.177 | 39.2±1.1 | 39.0±1.2 | 0.691 | 40.2±1.5 | 45.4±1.2 | 0.001*** | 0.001*** |  |  |  |  | |
| Eyes open | 120.0±0.0 | 112.8±7.3 | 0.169 | 98.0±4.4 | 112.6±3.9 | 0.026* | 78.9±5.6 | 92.1±6.2 | 0.175 | 79.8±7.3 | 101.5±5.9 | 0.001*** | 0.001*** |  |  |  |  | |
| 10m obstacle | 5.9±0.2 | 5.7±0.3 | 0.798 | 7.8±0.5 | 11.0±1.5 | 0.038* | 5.2±0.1 | 5.3±0.2 | 0.059 | 7.1±0.1 | 5.8±0.1 | 0.001*** | 0.001*** |  | 0.01** |  |  | |
| 6 min | 559.6±4.5 | 722.0±46.3 | 0.004** | 522.7±14.8 | 527.4±14.2 | 0.768 | 616.7±13.0 | 658.5±15.5 | 0.100 | 614.0±8.1 | 689.0±9.3 | 0.001*** | 0.001*** | 0.01** |  |  | 0.05* | |
|  |  |  |  |  |  |  |  |  |  |  |  |  |  |  |  |  |  | |
| **Go/no-go** | | | | | | | | | | | | | | | | | |
| Resp. time | 332.5±21.7 | 475.8±96.8 | 0.155 | 368.7±14.1 | 554.7±89.4 | 0.045* | 355.2±18.0 | 317.1±5.5 | 0.284 | 327.0±5.0 | 323.0±6.2 | 0.579 | 0.001*** |  | 0.01** |  |  | |
| Misses | 0.0±0.0 | 2.7±1.8 | 0.153 | 0.3±0.1 | 1.1±0.5 | 0.153 | 0.3±0.2 | 0.1±0.0 | 0.254 | 0.0±0.0 | 0.0±0.0 | 0.660 | 0.001*** |  |  |  |  | |
| Mistakes | 3.6±1.0 | 3.3±0.8 | 0.537 | 6.0±0.0 | 5.6±0.7 | 0.537 | 4.9±0.6 | 4.8±0.6 | 0.803 | 4.5±0.4 | 3.4±0.5 | 0.073 | 0.017* |  |  |  |  | |
| Errors | 3.6±1.0 | 5.9±2.5 | 0.753 | 6.3±0.8 | 6.7±1.1 | 0.753 | 5.3±0.6 | 4.9±0.6 | 0.538 | 4.5±0.4 | 3.5±0.5 | 0.071 | 0.194 |  |  |  |  | |

T: Thailand, P: Philippines, A: Matsumoto, I: Minowa, b: before, a: after, p: p value, mean ± SE, *p<0.05, **p<0.01, ***p<0.001
